# Supplementary material
Source: PubMed Central journal article supplement (PMC6211245)
Supplement: kwy172_raz_web_material_final.pdf [file kwy172_raz_web_material_final.pdf]

## Web Material

# Live Birth Bias and Observed Associations Between Air Pollution and Autism

Raanan Raz, Marianthi-Anna Kioumourtzoglou, and Marc G. Weisskopf

## High air pollution

## Low air pollution

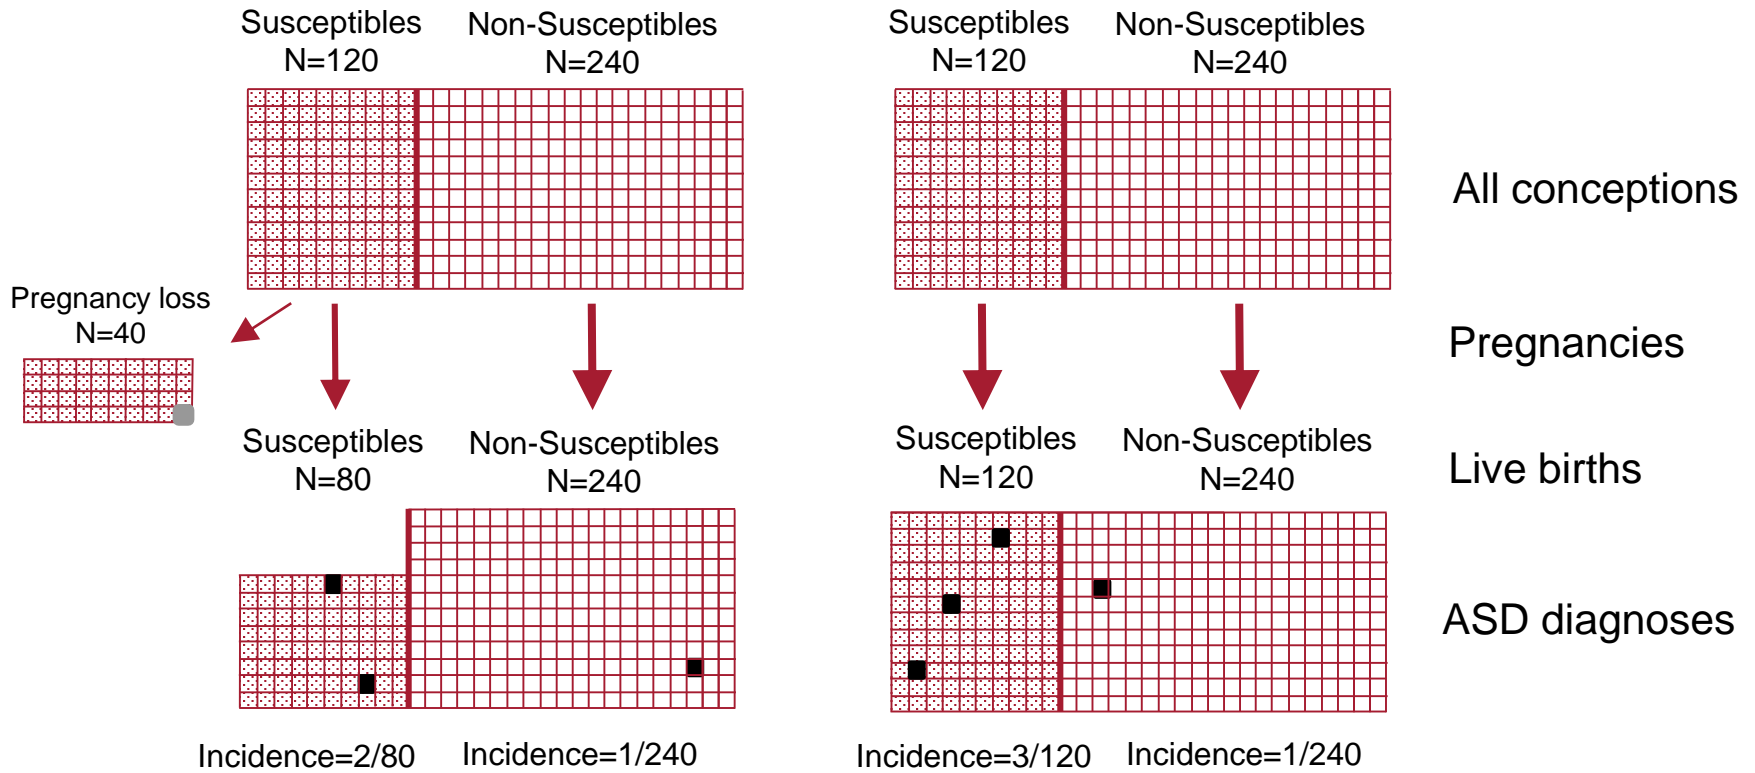

### Analysis table (live births only)

|                    | No ASD | ASD | Total |
|--------------------|--------|-----|-------|
| Low air pollution  | 356    | 4   | 360   |
| High air pollution | 317    | 3   | 320   |
| Total              | 673    | 7   | 680   |

$$\text{Relative Risk} = \frac{\frac{3}{320}}{\frac{4}{360}} = 0.84$$

Web Figure 1: An illustration of bias from depletion of susceptible fetuses. Susceptibility refers to risk of ASD, unrelated to air pollution; Black squares represent ASD cases. The gray square represents a fetus that would have been diagnosed with ASD had it survived the pregnancy. ASD = autism spectrum disorder.
